# Supplementary material for: Pleistocene glaciations, demographic expansion and subsequent isolation promoted morphological heterogeneity: A phylogeographic study of the alpine Rosa sericea complex (Rosaceae)
Source: PubMed Central journal article supplement (PMC5155592; doi:10.1038/srep11698), 2015-06-30
Supplement: srep11698-s1.pdf [file srep11698-s1.pdf]

**Pleistocene glaciations, demographic expansion and subsequent isolation promoted morphological heterogeneity: A phylogeographic study of the alpine *Rosa sericea* complex (Rosaceae)**

Yun-Dong Gao<sup>1</sup>, Yu Zhang<sup>1</sup>, Xin-Fen Gao<sup>1,2</sup>, Zhang-Ming Zhu<sup>1</sup>

1 Key Laboratory of Mountain Ecological Restoration and Bioresource Utilization & Ecological Restoration Biodiversity Conservation Key Laboratory of Sichuan Province, Chengdu Institute of Biology, Chinese Academy of Sciences

2 Author for correspondence, email: [xfgao@cib.ac.cn](mailto:xfgao@cib.ac.cn)

Supplementary info

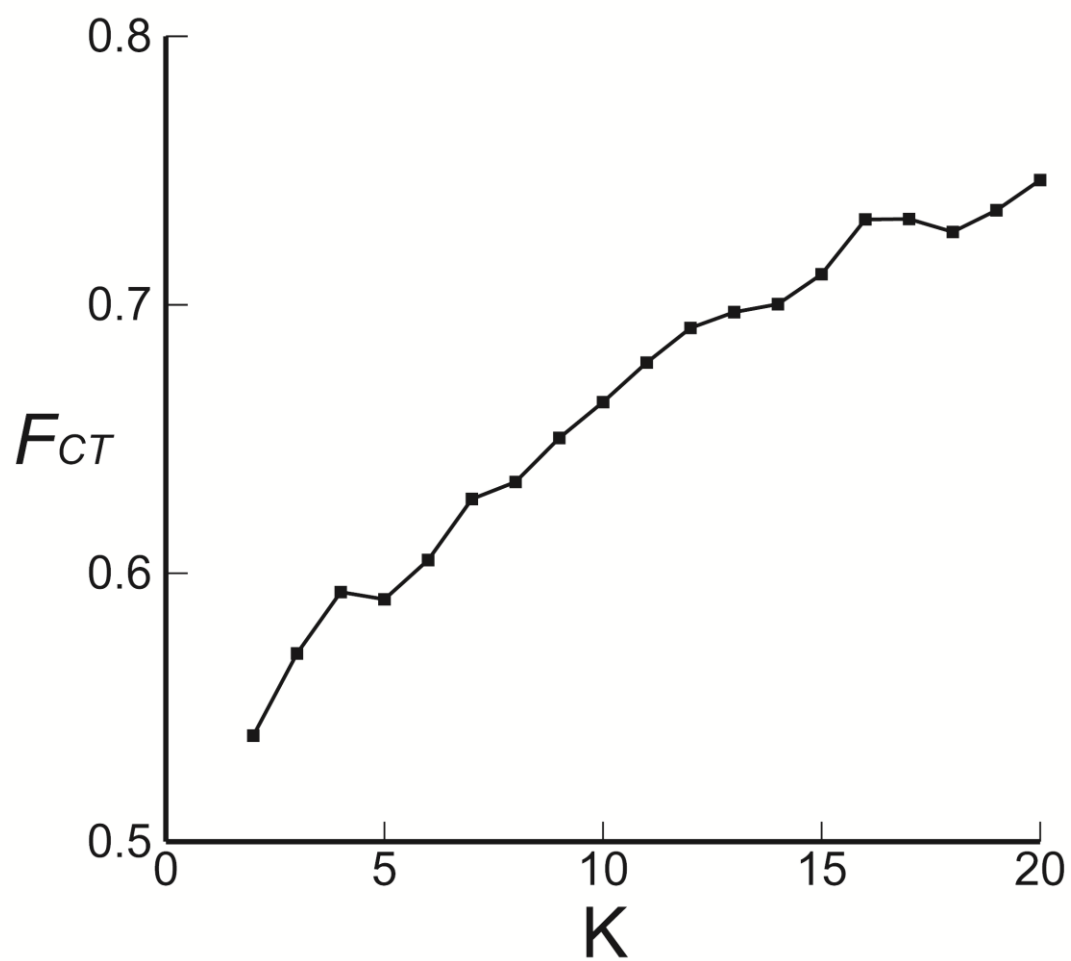

Figure S1. Correlation between the number of groups ( $K$ ) and genetic variance ( $F_{CT}$ ) in SAMOVA analysis.

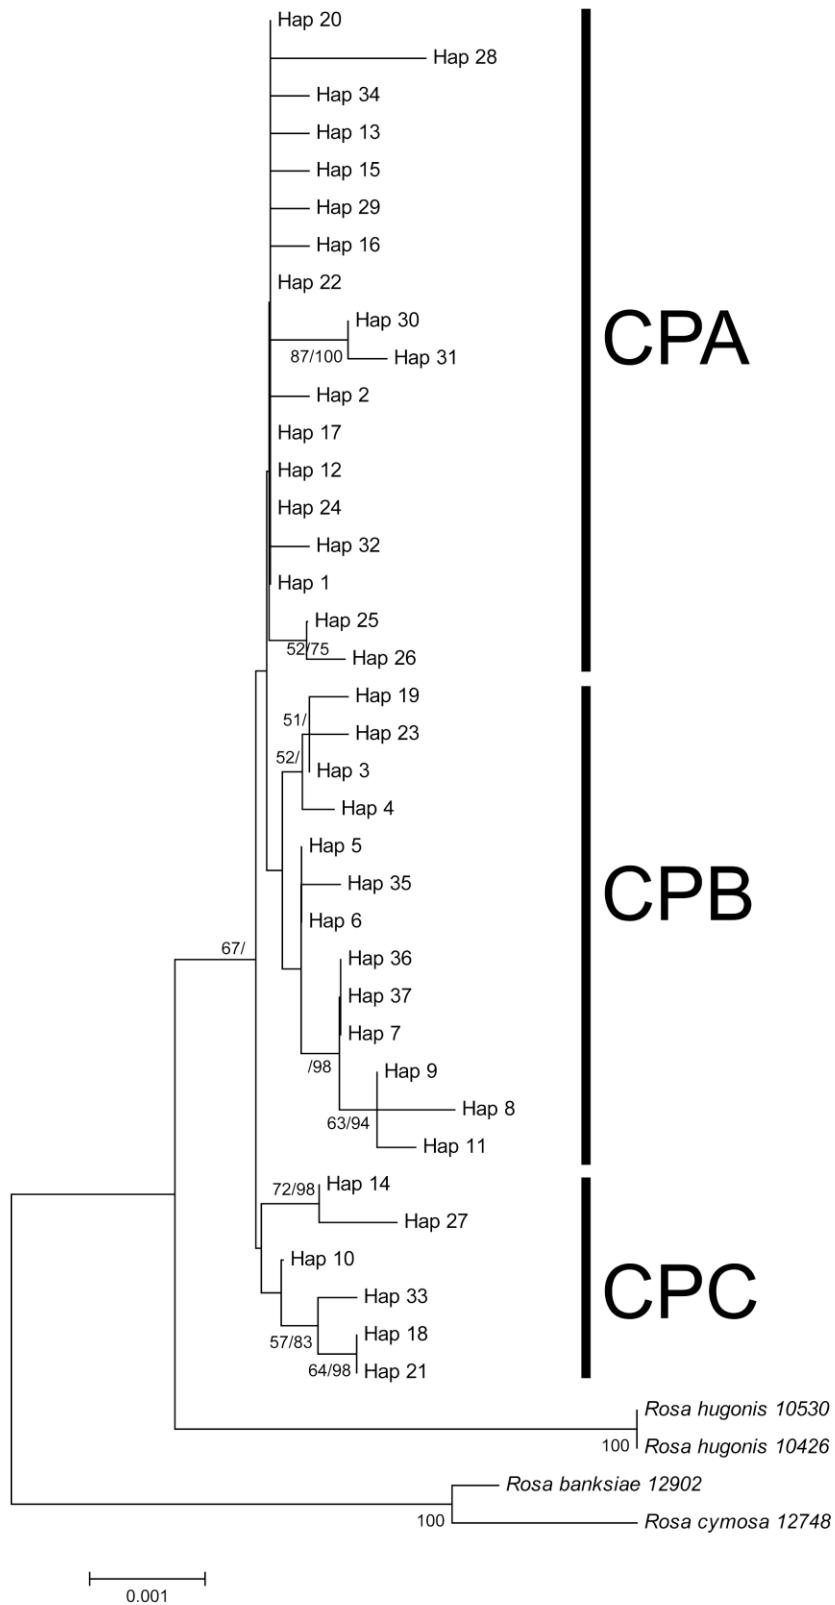

Figure S2. Phylogenetic topography based on plastid DNA dataset. Bootstrap values (BP) of Neighbor-joining analysis and posterior probabilities of Bayesian inferences (PP) are given as BP/PP format. Lineages were detected and labeled as CPA – CPC, respectively.

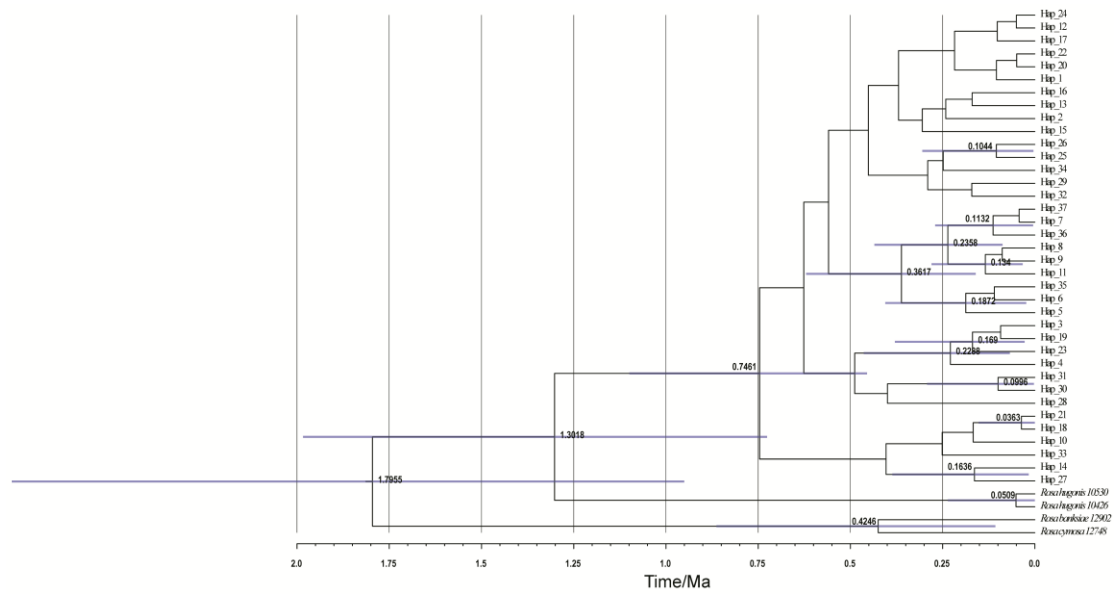

Figure S3. BEAST-generated maximum clade credibility tree of 37 haplotypes (H1-H37) identified in *Rosa sericea* complex, average substitution rate of  $2.0 \times 10^{-9}$  s/s/y was adopted.

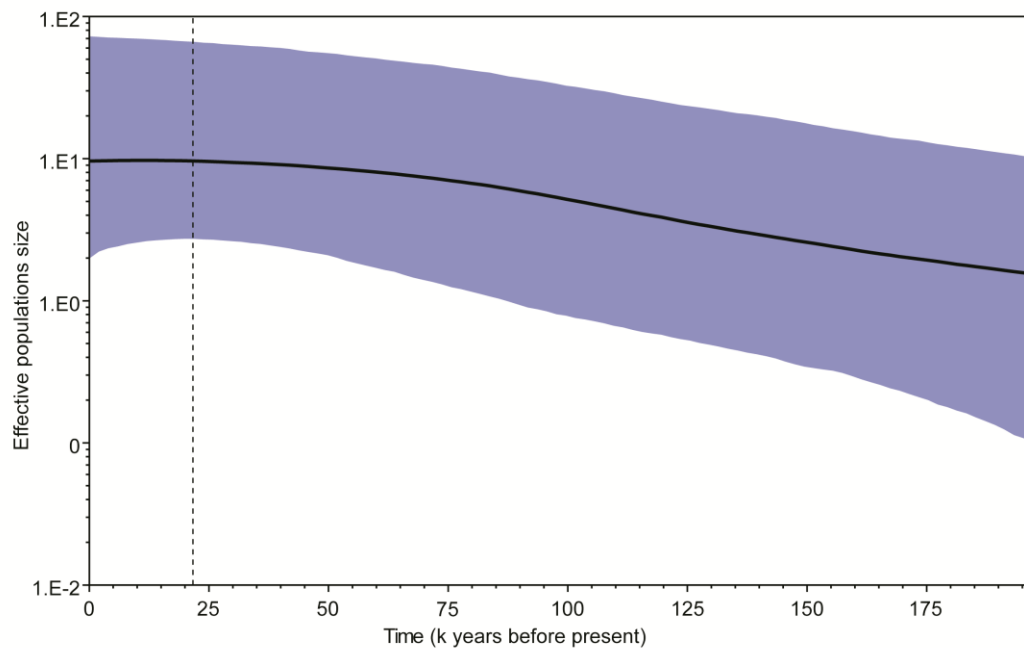

Figure S4. Bayesian skyline plot (BSP) estimate by BEAST for the whole populations of *Rosa sericea* complex: x-axis, time in kilo of years; y-axis, effective population size. The mean estimate and both 95% HPD limits are indicated. Dash line indicate the Last Glacial Maximum (LGM).
